# Supplementary figures and images for: Genome-Scale Analysis of Homologous Genes among Subgenomes of Bread Wheat (Triticum aestivum L.)
Source: MDPI journal article supplement (doi:10.3390/ijms21083015), 2020-04-24

(a)

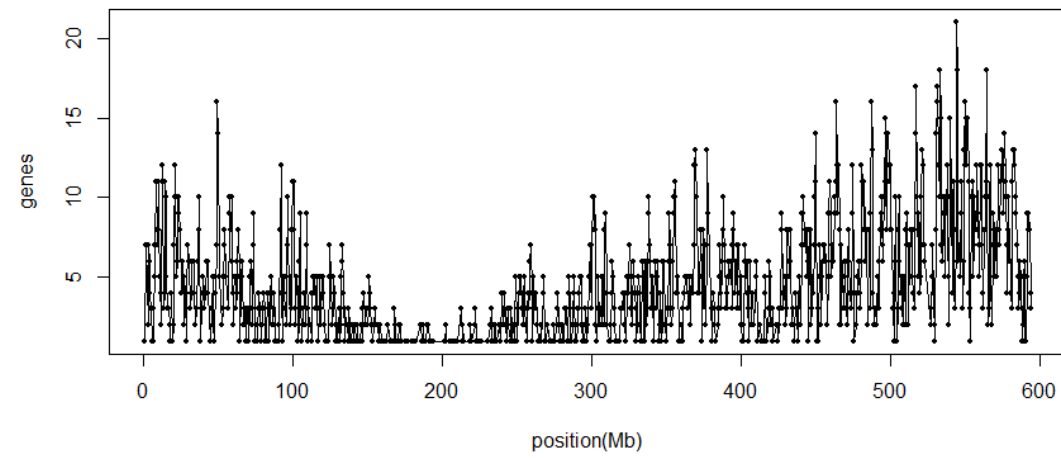

(b)

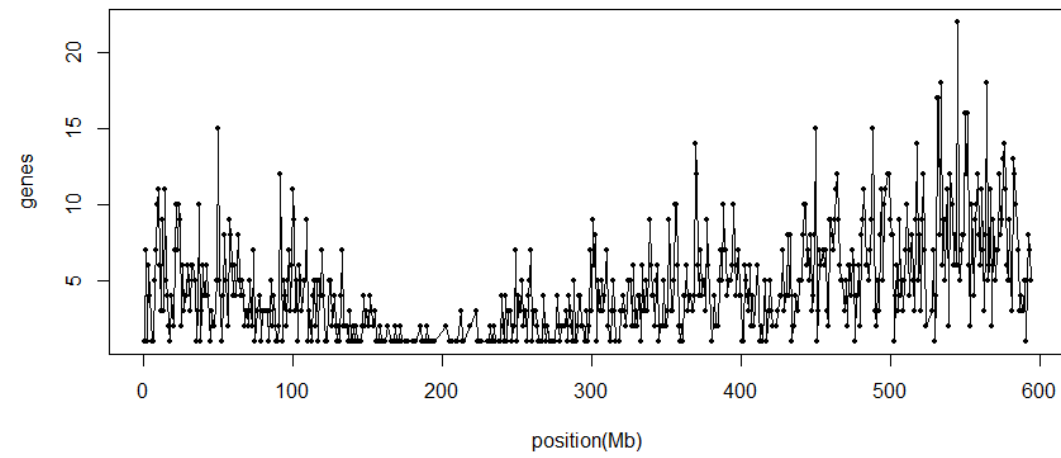

(c)

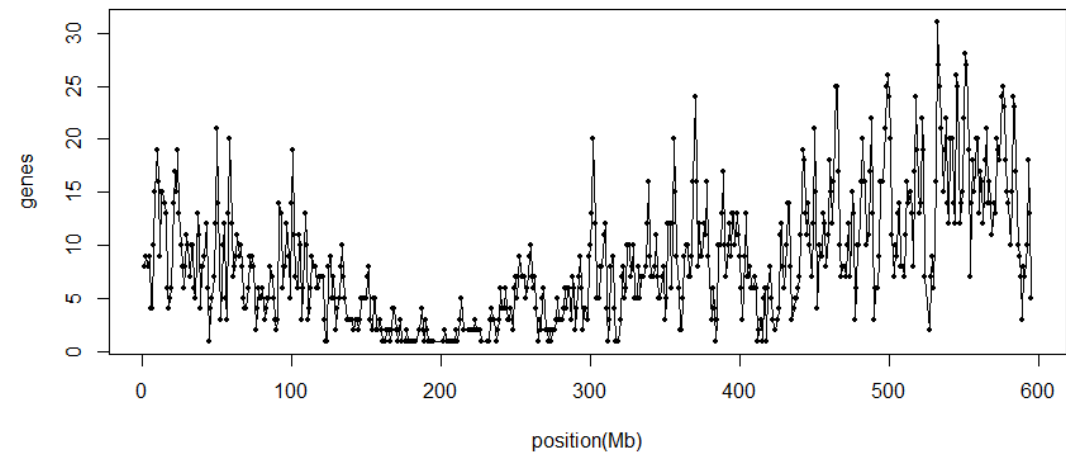

(d)

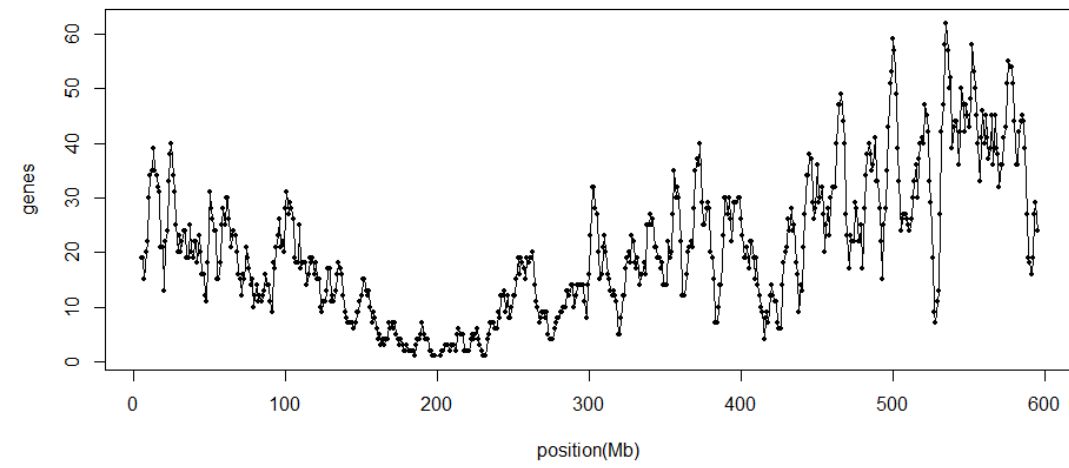

(e)

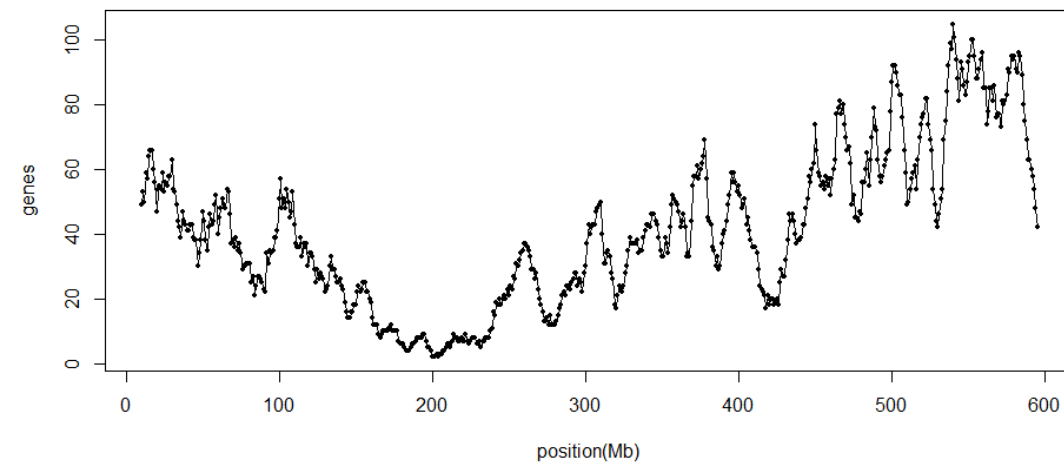

(f)

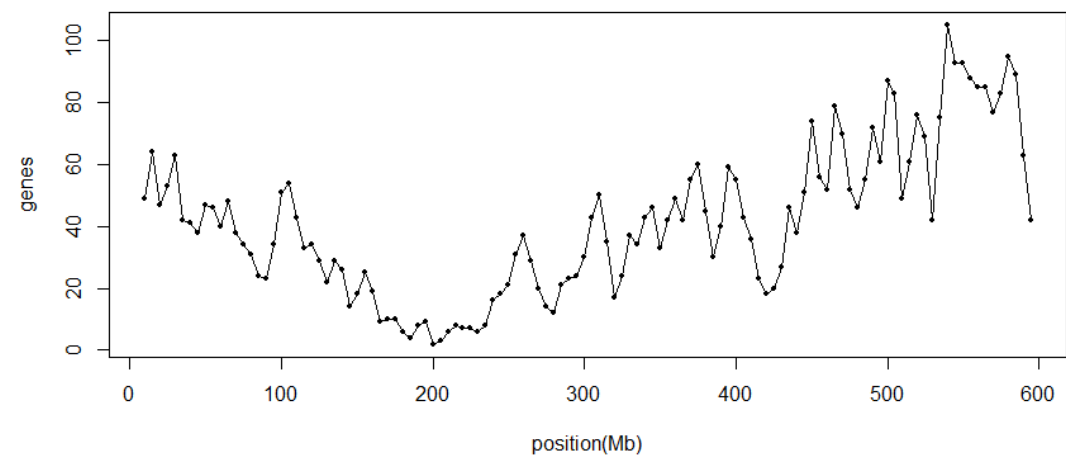

Supplement: s1 [file s1]
